# Supplementary material for: New insights into Subsurface Architecture of Gongola Basin: it’s Implication for Exploration Failure and Future successes in part of Gongola Basin, Upper Benue Trough, NE Nigeria
Source: Research Square preprint supplement (doi:10.21203/rs.3.rs-7227011/v1), 2025-09-19
Supplement: Supplementary file 1 [file f5d1531b68c4d6b5283d5297.doc]

APPENDIX


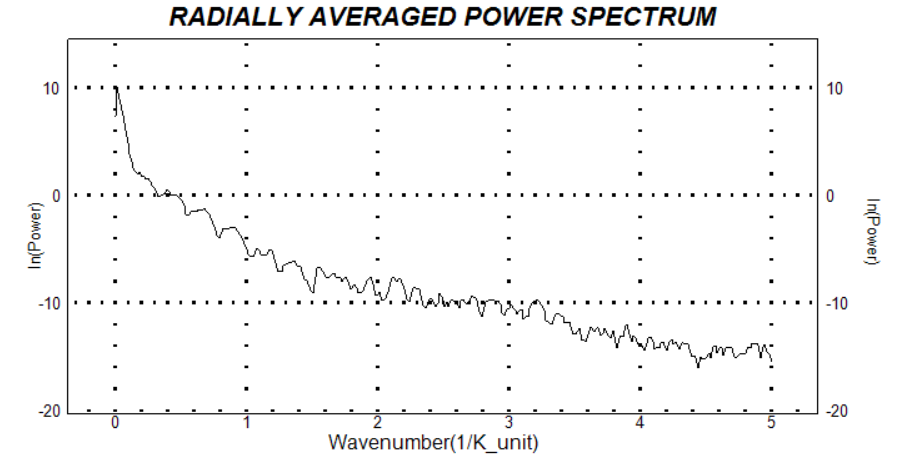


BLOCK A1


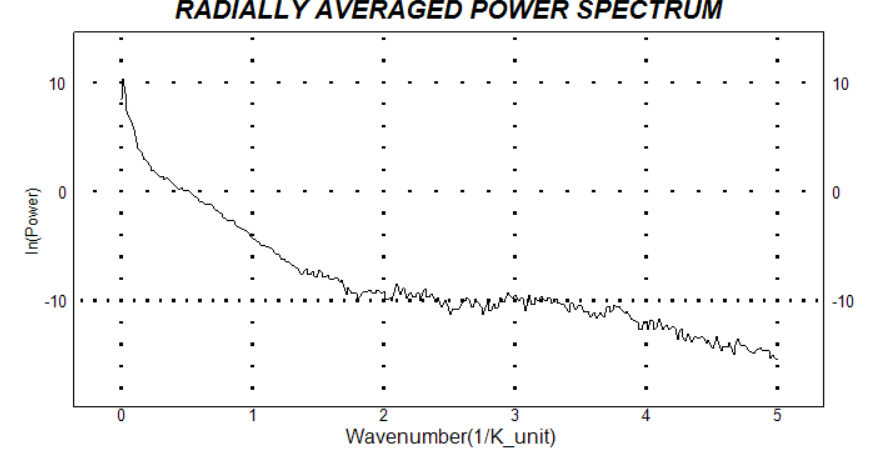


BLOCK A2


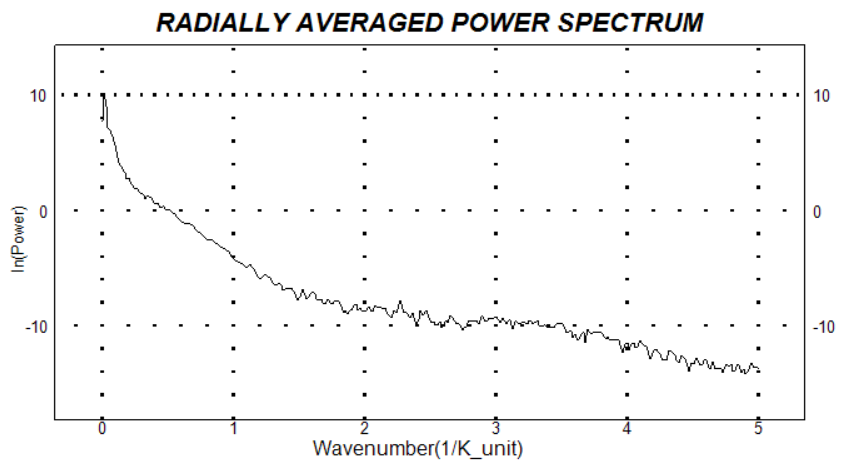


BLOCK A3


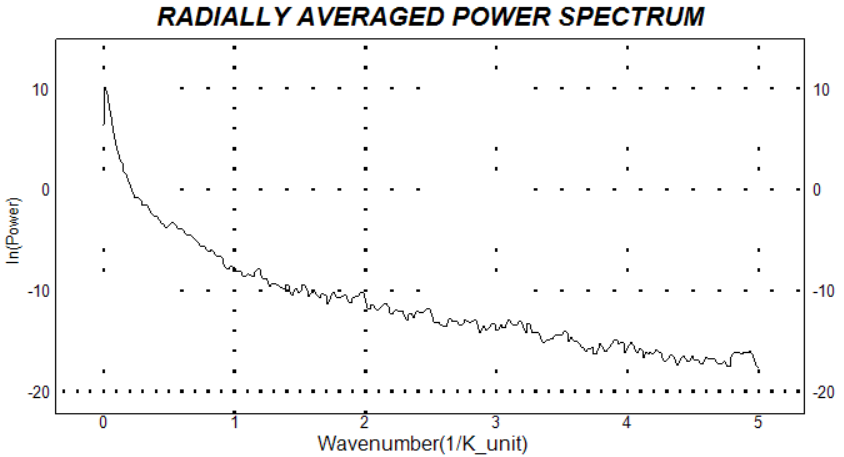


BLOCK B1


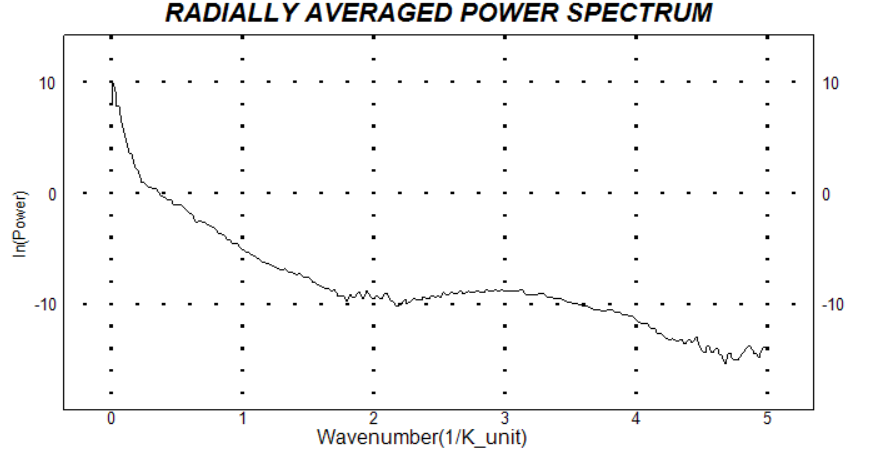


BLOCK B2


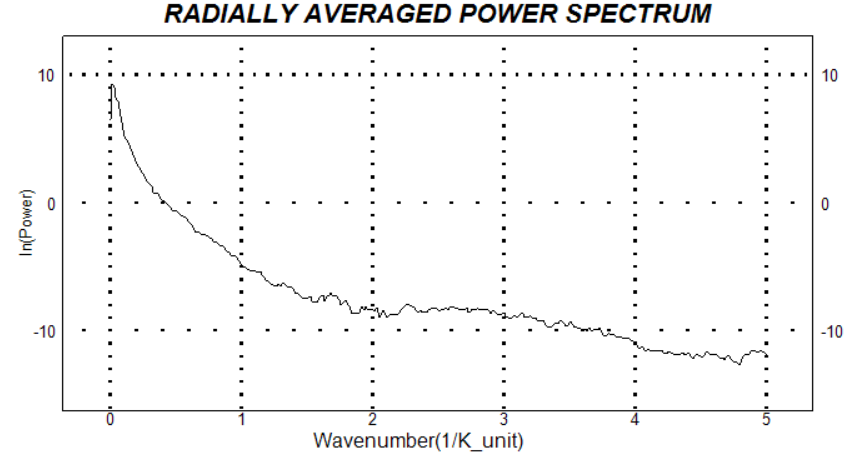


BLOCK B3


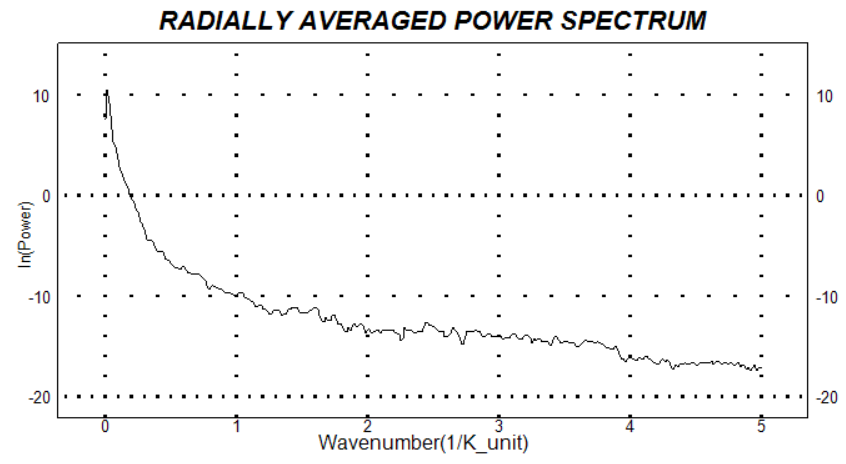


BLOCK C1


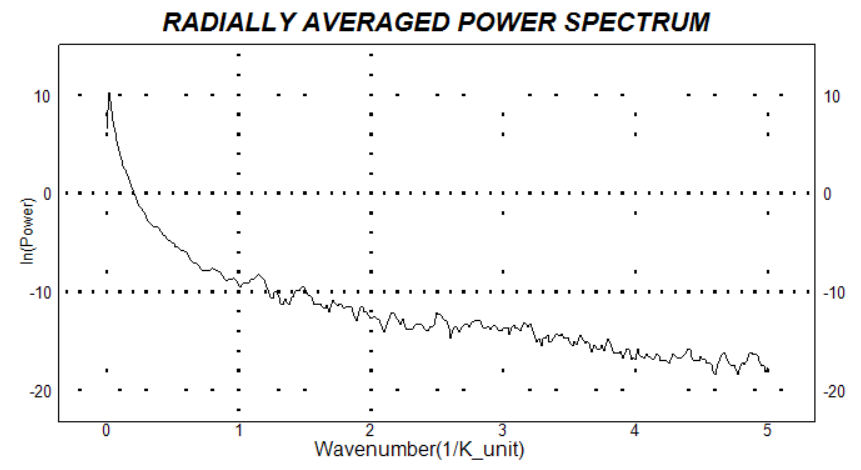


BLOCK C2


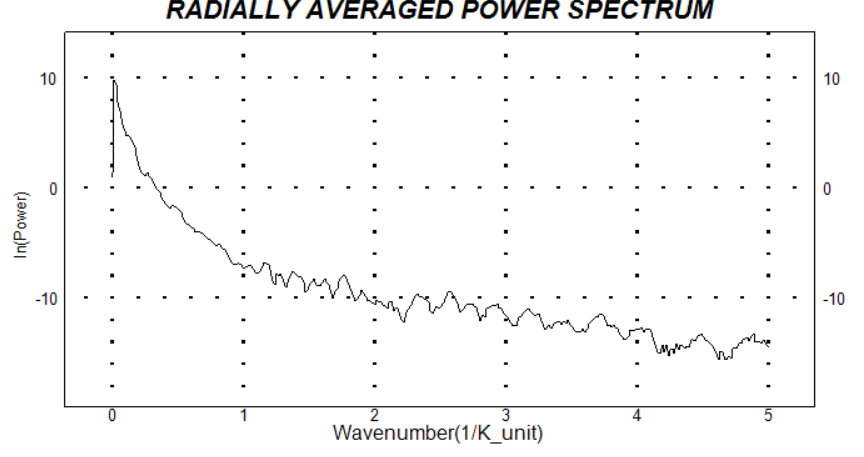


BLOCK C3


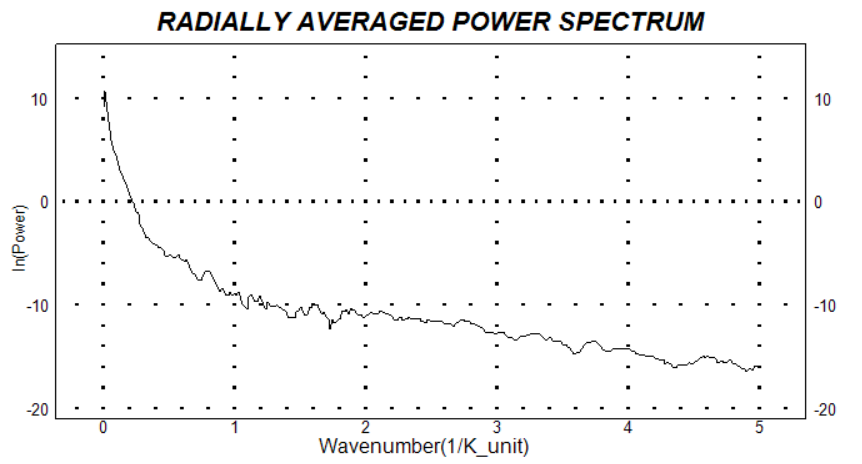


BLOCK D1


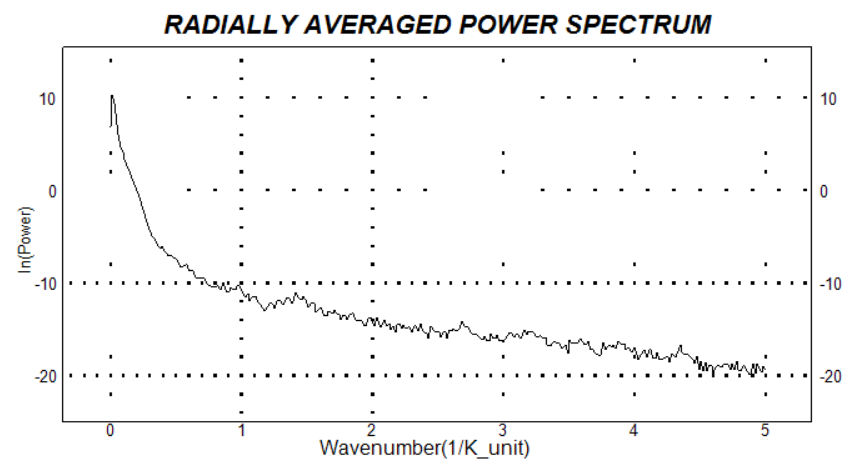


BLOCK D2


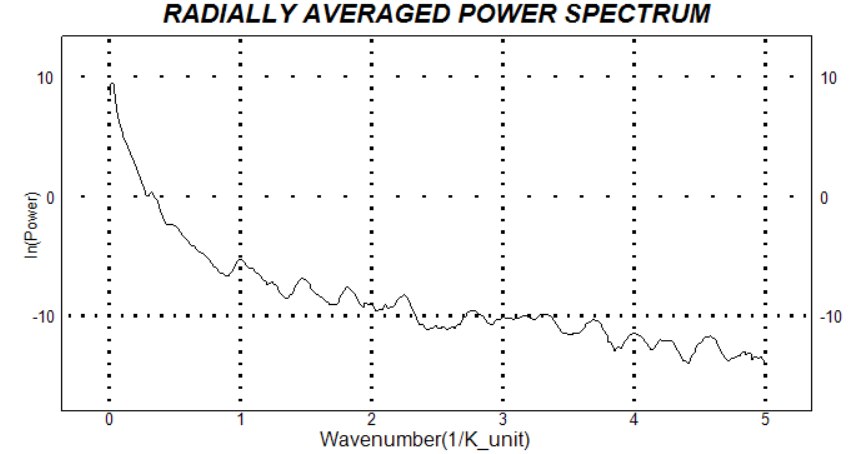


BLOCK D3


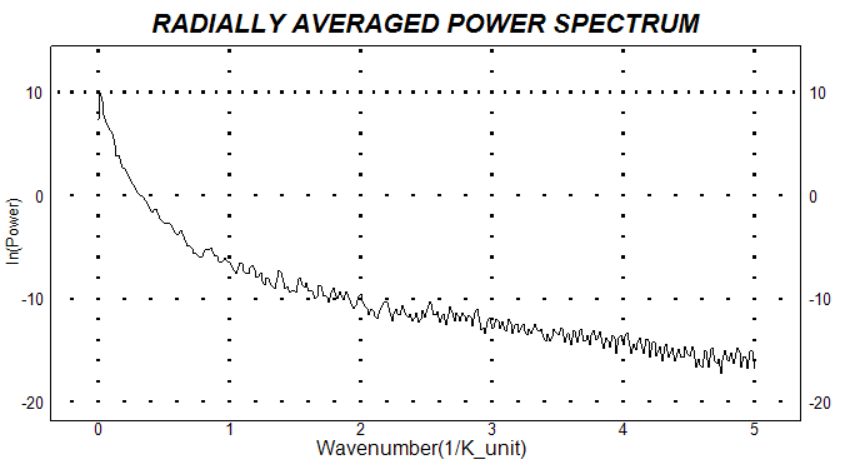


BLOCK E1


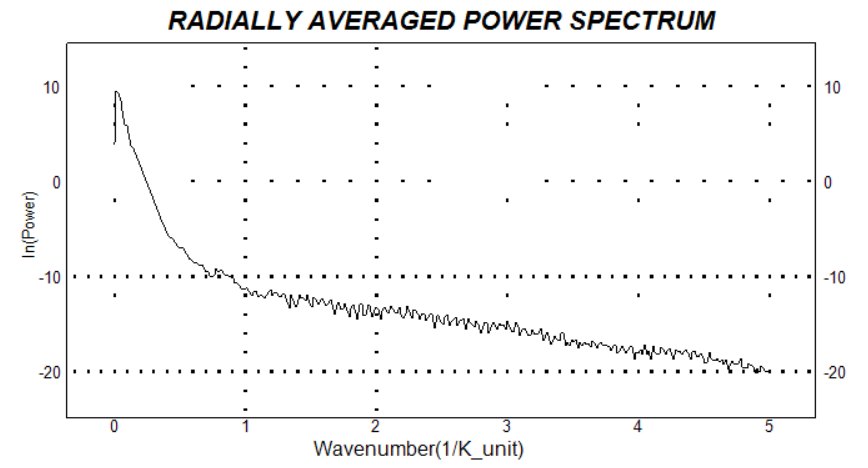


BLOCK E2


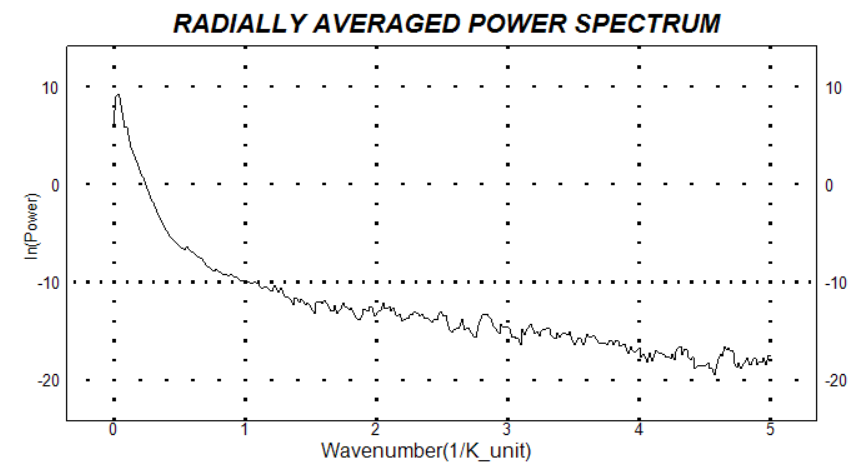


BLOCK E3
